# 1 Y chromosome sequencing data suggests dual paths 2 of haplogroup N1a1 into Finland

3 Annina Preussner<sup>1</sup>, Jaakko Leinonen<sup>1</sup>, Juha Riikonen<sup>1</sup>, Matti Pirinen<sup>1,2,3</sup>, Taru  
4 Tukiainen<sup>1</sup>

5

6 <sup>1</sup>Institute for Molecular Medicine Finland (FIMM), Helsinki, Finland;

7 <sup>2</sup>Department of Public Health, Faculty of Medicine, University of Helsinki,

8 Helsinki, Finland; <sup>3</sup>Department of Mathematics and Statistics, University of

9 Helsinki, Helsinki, Finland

10

11 **corresponding author:** Taru Tukiainen, taru.tukiainen@helsinki.fi

12

13

14

15

16

17

18

19

20

21

22

## 23    **KEYWORDS**

24    Y chromosome, Y-chromosomal haplogroups, chrY, Finnish population, N1a1

## 25    **ABSTRACT**

26    The paternally inherited Y chromosome is highly informative of genetic ancestry,  
 27    therefore making it useful in studies of population history. In Finland, two Y-  
 28    chromosomal haplogroups reveal the major substructure of the population:  
 29    N1a1 (TAT) enriched in the northeast and I1a (M253) in the southwest, suggested  
 30    to reflect eastern and western ancestry contributions to the population. Yet,  
 31    beyond these major Y-chromosomal lineages, the distribution of finer-scale Y-  
 32    chromosomal variation has not been assessed in Finland. Here we provide the  
 33    most comprehensive Y-chromosomal study among the Finns up to date,  
 34    exploiting full sequences for 1,802 geographically mapped Finnish Y  
 35    chromosomes from the FINRISK project. We assessed the distribution of common  
 36    Y-chromosomal haplogroups (frequency  $\geq 1\%$ ) throughout 19 Finnish regions,  
 37    and further compared the autosomal genetic backgrounds of the Y-chromosomal  
 38    haplogroups. With such high-resolution data, we identified novel sublineages and  
 39    geographical enrichment patterns among the major Finnish haplogroups N1a1  
 40    (64%), I1a (25%), R1a (4.3%), and R1b (4.8%). Most notably, we discovered that  
 41    haplogroup N1a1 splits into three major lineages within the country. While two  
 42    of the sublineages followed a northeastern enrichment pattern observed for  
 43    N1a1 in general, the sublineage N1a1a1a1a1a (CTS2929) (22% of all samples)  
 44    displayed an enrichment in the southwest. Further, the carriers of this  
 45    haplogroup showed a high proportion of southwestern autosomal ancestry

46 unlike the other N1a1 sublineages. Collectively, these results point to distinct  
47 demographics within haplogroup N1a1, possibly induced by two distinct arrival  
48 routes into Finland. Overall, our study suggests a more complex genetic  
49 population history for Finns than previously proposed.

## 50 INTRODUCTION

51 Data collected from the Finnish population has been widely used in many genetic  
52 studies, ranging from investigations of disease susceptibility to population  
53 genetics<sup>1,2</sup>. Relative isolation within the Northeastern corner of Europe (Figure  
54 1), together with small founder populations and several population bottlenecks,  
55 have shaped the genetic background of modern Finns distinguishable from other  
56 Europeans<sup>3</sup>. Additionally, the Finnish population has been further shaped by  
57 various cultural, political, and linguistic influences from differing directions,  
58 which have led to a degree of genetic differences seen within the country, most  
59 notably between eastern and western Finland<sup>4–7</sup>. These genetic east-west  
60 differences, in part illustrated by distribution of Y-chromosomal haplogroups, are  
61 suggested to reflect two separate influences from the eastern and western  
62 directions<sup>4,7,8</sup>.

63 The majority of Finnish men belong to the Y-chromosomal haplogroup N1a1  
64 (TAT) (also known as N1c1, N3), having an estimated frequency of 58% in the  
65 country<sup>7</sup>. N1a1 represents one of Northeast Eurasia's prominent patrilineages  
66 and is enriched especially among Finno-Ugric populations<sup>9</sup>. Within Finland, the  
67 highest frequencies of N1a1 are observed in the eastern regions of the  
68 country<sup>7,10</sup>, suggesting eastern introduction of this haplogroup into the country.

69 This aligns with the postulated Siberian origin of the haplogroup<sup>11,12</sup>. The  
70 frequency of N1a1 in Europe diminishes rapidly towards the west and south, and  
71 it is observed with very low frequencies in Central Europe<sup>13</sup>. Alongside N1a1, a  
72 notable proportion of Finnish men belong to haplogroup I1a (M253), carried in  
73 total by 28% of men<sup>7</sup>. While I1a is globally enriched in the Scandinavia reaching  
74 its peak frequency of 37% in Sweden<sup>14</sup>, unlike N1a1, it is more commonly  
75 observed across many European countries<sup>15</sup>. In Finland, I1a is especially frequent  
76 along the western coast of the country<sup>7</sup>, aligning with the suggested western  
77 influence on this haplogroup<sup>7,10</sup>. In addition to these two major Y-chromosomal  
78 lineages, approximately 10% of Finnish men belong to haplogroups R1a (L62) and  
79 R1b (CTS2134), which can be associated with Eastern and Western European  
80 ancestries, respectively<sup>7</sup>. In Finland, haplogroup R1a has been proposed to have  
81 eastern influences via Karelia to the country, whereas R1b has been suggested to  
82 have arrived from the western direction<sup>5</sup>.

83 While previous Y-chromosomal studies in Finland have provided insights into the  
84 major substructure of the population, revealing the dual origins of the Finnish  
85 gene pool<sup>7,8</sup>, these studies have been limited by the assessment of only a few Y-  
86 chromosomal haplogroups determined by genotyping established SNPs and  
87 STRs. Recent Y-chromosomal studies within other populations have  
88 demonstrated the power of leveraging the combination of sequencing and  
89 genotyping data to reveal substructure within major haplogroups, enabling the  
90 mapping of these haplogroups into more detailed and time-calibrated population  
91 historical events<sup>9</sup>. For instance, Ilumäe et al. (2016), in their comprehensive  
92 assessment of haplogroup N1a1 across its entire geographical enrichment area

93 in Northern Eurasia, showed that among northeastern European populations  
 94 haplogroup N1a1 divides into two distinct sublineages, N1a1a1a1a1a (VL29,  
 95 CTS2929, N3a3) and N1a1a1a1a2 (Z1936, CTS10082, N3a4), estimated to have  
 96 become widespread among different parts of the region over the last 5,000  
 97 years<sup>9</sup>. Further assessment of such finer level variation within individual  
 98 populations could potentially provide better detail into the demographics of the  
 99 Y-chromosomal haplogroups, which further have great potential to elaborate on  
 100 a population's history to a deeper detail.

101 In this study, we characterized the phylogeographic landscape of common Y  
 102 chromosome variation in Finland by utilizing full sequences of 1,802 Y  
 103 chromosomes mapped across 19 geographical regions within the country.  
 104 Overall, our study provides a refined description of the contemporary Y  
 105 chromosome landscape in Finland, revealing notable heterogeneity especially  
 106 related to haplogroup N1a1. Overall, our findings suggest that the genetic  
 107 population history of Finns may be more complex than previously suggested.

## 108 **MATERIALS AND METHODS**

### 109 **Samples**

110 The data for the present study was acquired from the THL biobank (study  
 111 numbers: BB2019\_44, THLBB2022\_28) and originated from the FINRISK Project,  
 112 which is a cross-sectional study of the Finnish working age population with the  
 113 aim to examine chronic disease risk factors in Finland<sup>16</sup>. FINRISK was initiated in  
 114 1972 and it has been carried out in 5-year cycles since its start. Our data set  
 115 consisted of 1,833 men, whose sex was determined by the registry information,

116 born between 1923 – 1979, included in FINRISK surveys 1992, 1997, 2002 or 2007  
 117 with whole-genome sequencing (WGS) data for the Y chromosome available in  
 118 the biobank (sample sizes by FINRISK surveys presented in Table S1). For each  
 119 individual, the acquired data included information on their Y chromosome  
 120 sequence, birthplace, and age. In addition, the majority of the samples had  
 121 information of their parental birthplaces (N=1,427), autosomal genotyping data  
 122 (N=1,712), and pre-computed autosomal ancestry profiles (N=758)<sup>17</sup>. These data  
 123 types are all described in detail later in the methods in their respective sections.  
 124 All study participants have given a written consent.

## 125 **Whole genome sequencing data quality control**

126 Whole-genome sequencing (WGS) was performed for a subset of the FINRISK  
 127 participants (N=3,322 males and females) at the University of Washington using  
 128 target coverage of 20x. The reads were mapped to the human genome assembly  
 129 GRCh38, and variant calling was performed for the whole genome together with  
 130 thousands of additional samples. Only calls for the Y chromosome were acquired  
 131 for this project, comprising 1,833 male samples and 295,292 Y-chromosomal  
 132 variants. Notably, 117,536 (40%) of these sites initial sites were non-polymorphic  
 133 due to the joint variant calling. We performed variant and sample-wise quality  
 134 control for the data, removing variants falling on other than X-degenerate, X-  
 135 transposed or ampliconic regions (definition of MSY regions in Table S2 acquired  
 136 from<sup>18</sup>), variants without PASS filter, mapping quality  $\leq 20$ , base quality z-score  
 137  $\leq |2|$ , strand bias FS  $> 13$ . All heterozygous calls were set as missing. Sites with  
 138  $> 5\%$  missing data, and non-polymorphic sites were excluded, leaving 10,241

139 variants in the data. Two samples were excluded due to having more than 75%  
140 of missing data, leaving 1,831 samples in the data set.

### 141 **Allele frequency concordance with Finnish WGS datasets**

142 For the variants passing the quality control, we compared the allele frequency  
143 concordance with three WGS datasets of Finns: Sequencing Initiative Suomi  
144 (SISu) (N=7,019)<sup>19</sup>, gnomAD v3.1.2 (N=4,029)<sup>20</sup> and to a combined resource from  
145 the 1000 Genomes Project and Human Genome Diversity Project data  
146 (1kGP+HGDP) (N=38)<sup>21</sup>. The sequencing data from 1kGP+HGDP was filtered with  
147 the same criteria as our FINRISK data, leaving 6,229 variants and 38 Finnish  
148 samples in the data. For SISu and gnomAD, which also contain the FINRISK  
149 samples used in our study, we only acquired variant level summary data. SISu  
150 variants were filtered with call rate  $\geq 95\%$ , heterozygous call rate  $\leq 0.01$ , removing  
151 indels and non-polymorphic variants, yielding 68,624 variants (called for 7,019  
152 Finnish samples). gnomAD variants were filtered to exclude non-polymorphic  
153 variants, yielding 44,553 variants (called for 4,029 Finnish samples).

154 Most of the variants identified in our data were found in these reference data  
155 sets (9,756 variants; 95%) with an overall good allele frequency concordance  
156 (Figure S1). We accepted the allele frequencies to differ up to 15 percentages  
157 between FINRISK and the reference data sets, since the variant frequencies are  
158 known to vary extensively based on the geographical location<sup>7</sup>. Out of our  
159 variants, 485 (5%) were not found in these reference datasets, with these having  
160 low frequencies ( $MAC \leq 18$  in our data). Given our samples were included also in  
161 the reference datasets of SISu and gnomAD, these variants were probably not

162 observed in the reference datasets due differences in filtering steps, thus we  
163 decided to remove these 485 variants from our data, leaving 9,756 variants in the  
164 final data set.

165 Overall, most of the detected Y-chromosomal variants were rare ( $MAF \leq 0.01$ )  
166 (7,792; 80%), including 3,488 singletons. Out of all variants, 3,348 (34%) were  
167 annotated as haplogroup-defining in ISOGG (v15.73) and 1,381 (14%) of the  
168 variants were protein coding based on variant effect predictor annotations<sup>22</sup>.

## 169 **Geographical location of the samples**

170 Geographical location of the samples was determined by mapping the samples  
171 into 19 geographical regions, comprising 18 current administrative regions within  
172 Finland and one former Finnish region (Ceded Karelia) that today belongs to  
173 Russia (Figure 1). For most of the samples, we utilized the father's birthplace as  
174 the geographical origin (N=1,427), since this enables to map the samples one  
175 generation back in time and limits the effects of recent population movements.  
176 The remaining samples missing information of their parental birthplaces (N=400),  
177 were mapped into the regions using their own birthplace. We removed samples  
178 with missing geographical data (N = 4), samples having their birthplace abroad (N  
179 = 24), and one individual from Åland Islands due to the low coverage of the  
180 region, overall leaving 1,802 samples in the final dataset (Table 1; Figure S2). We  
181 acknowledge that the modern administrative regions may not be the most  
182 informative regions for population genetic analyses, yet this approach enabled  
183 us to preserve individual privacy and still provide sufficient information of the  
184 sample's geographical distribution.



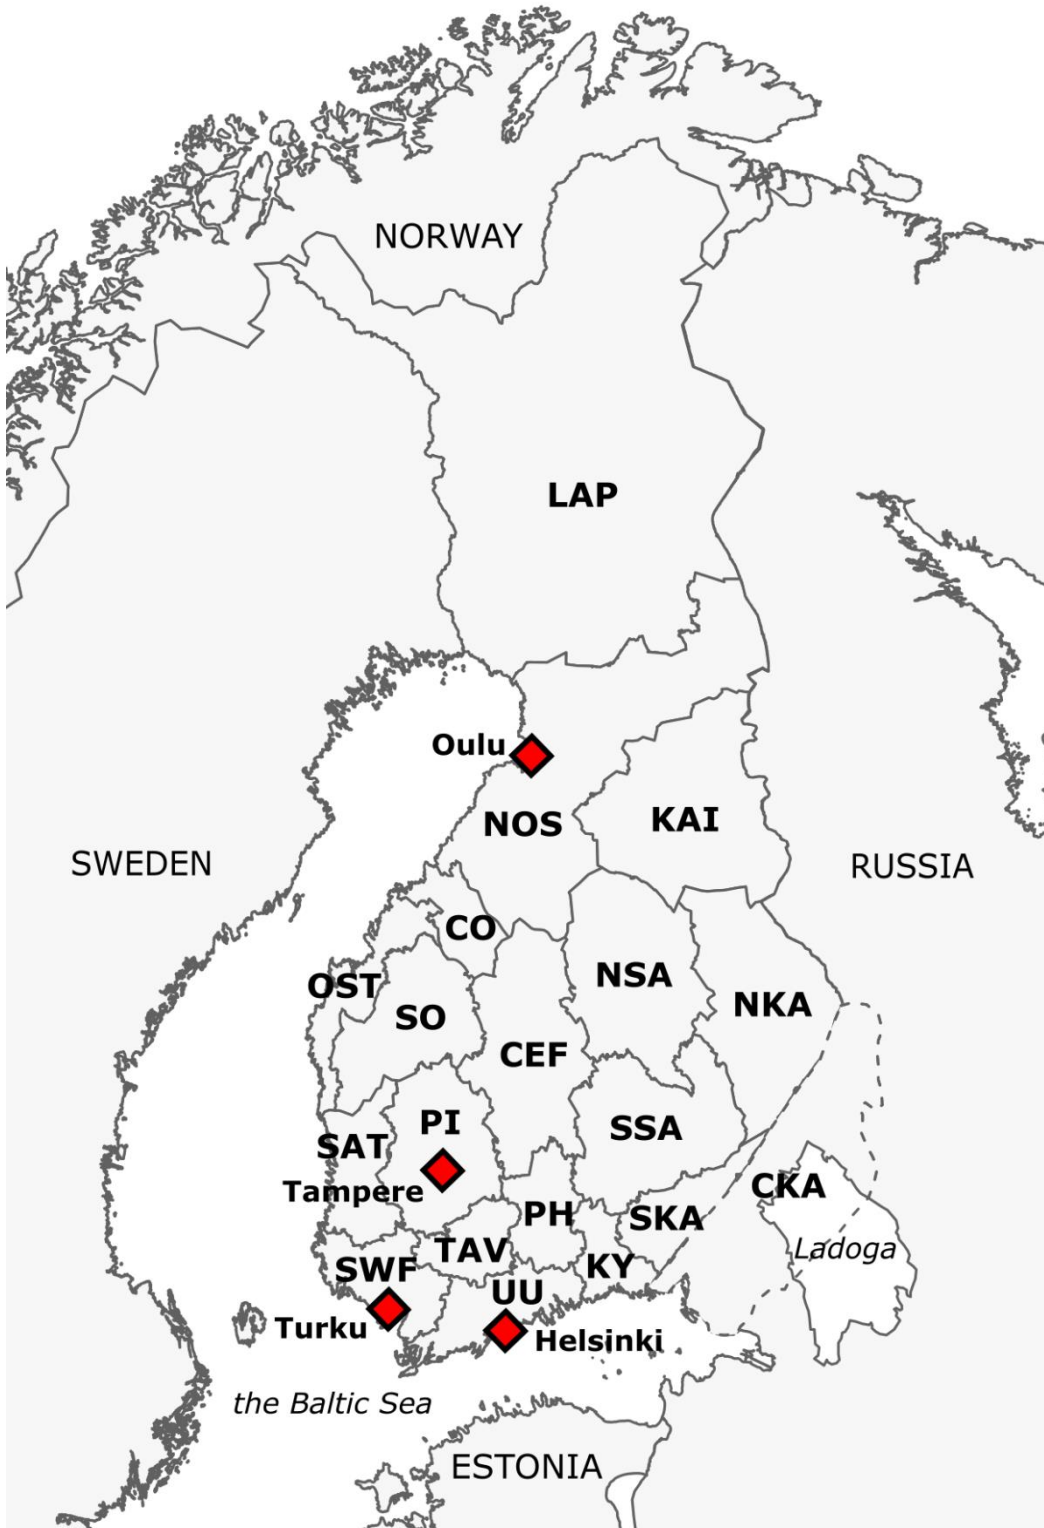

**Figure 1** – Geographical regions covered in this study. The region names are abbreviated in bold, and their full names are provided in Table 1. Red diamonds highlight 4 of the largest metropolitan areas in Finland. The metropolitan area of Helsinki also includes cities of Espoo and Vantaa. The majority of the Finnish population is located in the southern areas of the country, with Uusimaa (UU) encompassing 31% of the whole population<sup>23</sup>.

190 **Table 1** – Full names of the studied regions with sample sizes based on the assigned geographical  
191 locations. Majority of the samples come from eastern parts of the country due to the sampling  
192 strategy of the FINRISK project.

| region | full name             | N   |
|--------|-----------------------|-----|
| NKA    | North Karelia         | 392 |
| NOS    | Northern Ostrobothnia | 239 |
| NSA    | Northern Savonia      | 232 |
| LAP    | Lapland               | 192 |
| UU     | Uusimaa               | 154 |
| CKA    | Ceded Karelia         | 111 |
| KAI    | Kainuu                | 97  |
| SWF    | Southwest Finland     | 74  |
| SO     | South Ostrobothnia    | 48  |
| CEF    | Central Finland       | 48  |
| PI     | Pirkanmaa             | 46  |
| SSA    | Southern Savonia      | 40  |
| SKA    | South Karelia         | 31  |
| KY     | Kymenlaakso           | 25  |
| SAT    | Satakunta             | 21  |
| TAV    | Tavastia              | 16  |
| CO     | Central Ostrobothnia  | 15  |
| PH     | Päijät-Häme           | 15  |
| OST    | Ostrobothnia          | 6   |

193

## 194 **Haplogrouping and haplogroup nomenclature**

195 Y-chromosomal haplogroups were assigned for each sample with  
196 YLineageTracker<sup>24</sup>, which currently is one of the most accurate software tools  
197 designed to allocate haplogroups based on VCF formatted data<sup>25</sup>. We annotated  
198 the haplogroups and haplogroup-defining variants according to the International  
199 Society of Genetic Genealogy (ISOGG) v15.73<sup>26</sup> nomenclature. Nevertheless, due  
200 to the constantly evolving nomenclature system, we also refer to the  
201 haplogroups by their defining markers throughout the text.

## 202 Haplogroup frequencies

203 To assess frequencies for the common haplogroups in Finland with at least 1%  
 204 frequency, we first selected all terminal haplogroups from YLineageTracker  
 205 output (i.e., the finest resolution haplogroups that could be classified), and  
 206 extended this to include also higher nodes within their phylogeny to better group  
 207 the rare and distinct haplogroups into larger entities. We then filtered these  
 208 haplogroups to include only common haplogroup-defining variations in the  
 209 Finnish population, that were observed as a terminal haplogroup or their upper  
 210 nodes in at least 1% of the data.

211 The haplogroup frequencies were assessed directly as the allele frequencies of  
 212 the haplogroup-defining variants, and these are referred to as unscaled  
 213 frequencies. Since majority of our samples were collected from northeastern  
 214 parts of the country (Table 1), we further normalized the variant frequencies by  
 215 weighting each regional frequency estimate with the corresponding population  
 216 size from Statistics Finland from year 2022<sup>23</sup>, and used these to calculate the  
 217 frequency estimate within the whole country. This provided more accurate  
 218 haplogroup frequency estimates among the Finnish population, and these are  
 219 referred to as scaled frequencies. We further calculated 95% confidence intervals  
 220 for the frequency estimates of the major haplogroups by the following equation,  
 221 where  $p$  is the haplogroup proportion and  $n$  is the total sample size:

$$222 \quad 95\% \text{ CI} = p \pm 1.96 \sqrt{\frac{p(1-p)}{n}}$$

## 223 **Phylogeny reconstruction**

224 To assess the phylogenetic relationships of the common haplogroups within the  
 225 population, we built a maximum likelihood (ML) tree with RAxML v8.2.12<sup>27</sup>. We  
 226 randomly selected a subset of 55 samples representing distinct haplogroups  
 227 having at least 1% frequency (haplogroup and its subgroups together) in the data,  
 228 to focus on the major phylogenetic tree structure and to reduce the  
 229 computational load of the analysis. We additionally selected one sample with  
 230 haplogroup E to root the tree. RAxML was ran with the GTRGAMMA model by  
 231 computing a starting tree from 20 runs, bootstrapping over 100 replicates, and  
 232 combining these into the final output tree visualized in FigTree v.1.4.3 (Rambaut,  
 233 2006-2016) (Figure S3).

## 234 **Time estimation**

235 We estimated time to most recent common ancestor (TMRCA) by calculating the  
 236 average number of newly acquired mutations within the subclades of a given  
 237 haplogroup node<sup>28</sup>. Since the Y chromosome consists of variable sequence  
 238 classes having different mutation rates<sup>29,30</sup>, we only considered variation in the  
 239 X-degenerate region (XDR) within these calculations. Since we were interested  
 240 here in the ages of haplogroup N1a1 sublineages, we assigned all variants that  
 241 were polymorphic only within haplogroup N1a1 as “derived” mutations. We then  
 242 randomly selected one sequence from each of the N1a1 sublineages detected by  
 243 YLineageTracker (N=98) and calculated the number of derived mutations  
 244 observed within each haplogroup, and shared mutations within upper nodes  
 245 according to the phylogenetic tree structure.

Next, we used two methods to derive the TMRCA estimates from the calculated number of mutations. We utilized a calibration point for haplogroup N1a1a1a1a TMRCA at 4995 (4353 – 5700) ya<sup>9</sup> which yielded with our data a rate of 235,1 (CI: 204,9 – 268,3) years per mutation. Additionally, we used a previously reported mutation rate of 268,5 (CI: 246,3 – 291,9) years per mutation<sup>31,32</sup> to estimate the TMRCA's. This mutation rate had been calculated by the rate of  $1.0e^{-9}$  mutations per position per year (CI:  $0.92e^{-9}$  –  $1.09e^{-9}$ ), generation time of 30 years, and the XDR region length of 3,7 Mb that is uniquely mappable of the XDR<sup>31,33</sup>. Nevertheless, since in our study we only had access to a VCF file we can only assume a similar mapping coverage for the XDR region in our data. Although both these methods rely on many assumptions, e.g., about the mapping quality in our data, mutations occurring at a fixed rate, our estimates were comparable with previous studies<sup>9</sup>.

## Geographical enrichment

To assess the geographical enrichment of the Y-chromosomal variation in the population, we calculated regional frequencies for common haplogroup-defining variations ( $\geq 1\%$  frequency) and assessed their regional enrichment within the country by a  $\chi^2$  test with equal frequencies across all regions as the null hypothesis. We calculated the regional frequencies out of all samples (e.g., I1a out of all samples), and out of major haplogroup carriers (e.g., I1a1a out of I1a carriers), and further visualized both these enrichments on a regional level (online figures). To protect sample privacy and to provide more consistent frequency estimates, on regions with low coverage of samples we used regional

269 averaging when estimating the regional frequencies. This regional averaging was  
 270 performed by adding all samples from the geographically closest region(s) to the  
 271 target region until reaching a certain threshold of samples and calculating the  
 272 frequency estimate using this combined set of samples. When visualizing the  
 273 enrichments out of all samples, we set a minimum threshold of 15 samples within  
 274 each region, and out of major haplogroup the threshold was set to at least 10  
 275 major haplogroup carriers per region. The visualizations were performed in R  
 276 utilizing maps from geoBoundaries package<sup>34</sup>. We note that the less frequent  
 277 haplogroups (e.g., those with 1% frequency in the population) may be  
 278 inaccurately visualized on a regional level due to the use of regional averaging.

## 279 **Autosomal data quality control**

280 To link the Y-chromosomal variation with autosomal genetic variation, we  
 281 assessed imputed autosomal genotyping data for 1,710 samples. The samples  
 282 were genotyped with multiple genotyping arrays (Table S1) and imputation was  
 283 carried out by using the population-specific SISu v3 imputation reference panel  
 284 with Beagle 4.1 (version 08Jun17.d8b)<sup>35</sup> as described in the following protocol:  
 285 [dx.doi.org/10.17504/protocols.io.nmndc5e](https://doi.org/10.17504/protocols.io.nmndc5e) . Before quality control, the dataset  
 286 consisted of 1,710 individuals and 16,962,023 variants. We performed variant  
 287 and sample-wise quality control for each chromosome separately in PLINK 2.0<sup>36,37</sup>  
 288 removing variants with INFO < 0.99, genotyping quality < 0.99, HW p-value < 1e-  
 289 6, sites with > 1% missing data and multiallelic sites. To obtain a set of  
 290 independent variants, LD-pruning was performed with 1,000 kb windows, step  
 291 size 1 and with  $r^2$  threshold of 0.2. After these variant filtering steps, sample-wise

292 quality control was performed by removing individuals if they were born abroad,  
293 had missing birth region information, or had excess heterozygosity (deviating  
294 more than 4SD units from the mean). After the quality control, the dataset  
295 consisted of 1,709 male samples and 119,455 autosomal variants.

## 296 **Sample relatedness**

297 Sample relatedness was inferred in PLINK 2.0<sup>36,37</sup> for the 1,709 samples with  
298 autosomal genetic data available. In total 32 sample pairs were classified as  
299 closely related (3 pairs as 1<sup>st</sup> degree, and 29 pairs as 2<sup>nd</sup> degree), whereas 1,677  
300 samples were classified as unrelated (kinship coefficient < 0.0442). Since 122  
301 samples were lacking autosomal data, we estimated the number of expected  
302 relationships that may be present in the whole data. Among our autosomal  
303 samples, the rate of 1<sup>st</sup> degree related pairs was  $3/(1709*1708/2)$  and rate of 2<sup>nd</sup>  
304 degree related pairs was  $29/(1709*1708/2)$ , thus we expect that in our whole  
305 data of 1,802 we should detect 3.3 of 1<sup>st</sup> degree and 32.2 of 2<sup>nd</sup> degree related  
306 sample pairs, numbers unlikely to bias the haplogroup frequencies estimated  
307 with the whole data. Therefore, we used the whole dataset comprising the 1,802  
308 samples in our main Y-chromosomal analyses, and further utilized the confirmed  
309 set of unrelated samples for validating the results. From the unrelated data set  
310 we included 1,650 samples in our validation analyses, since these were part of  
311 our quality control passing Y-chromosomal dataset having their paternal  
312 birthplaces in Finland.

## 313 **Principal component analysis**

314 We performed autosomal principal component analysis (PCA) for the 1,709  
 315 samples. We first performed PCA in PLINK 2.0<sup>36,37</sup> for a subset of unrelated  
 316 samples with autosomal data (N = 1,604) and used the output further in  
 317 projecting PC scores for all 1,709 samples with autosomal data available. We then  
 318 used the autosomal PCs to compare their distributions between the carriers of  
 319 different Y-chromosomal haplogroups and performed correlation analysis  
 320 between the PC scores and Y-chromosomal haplogroup frequencies. The PCs  
 321 were mapped to geographical regions using the samples' own birthplaces (Figure  
 322 S2), since using only the father's birthplace is an inaccurate measure for  
 323 autosomal genetic origin.

## 324 **Autosomal ancestry profiles by 10 reference populations**

325 To define the autosomal genetic backgrounds of the Y chromosome lineages to a  
 326 finer and more interpretable detail, we further assessed pre-defined autosomal  
 327 ancestry profiles created by Kerminen et al. (2021), where the major source of  
 328 ancestry is accurately detected three generations back in time. The ancestry  
 329 profiles were based on 10 genetically and geographically mapped Finnish  
 330 reference populations, and these profiles were available for 758 samples in our  
 331 data. We assessed the major source of ancestry for each sample by the criteria  
 332 of sharing at least 50% of their genome with one reference population, resulting  
 333 in 485 samples with one major source of ancestry. We used these autosomal  
 334 ancestry profiles to compare their distributions between different Y-  
 335 chromosomal haplogroup carriers.



## 336 RESULTS

### 337 Y-chromosomal variation in Finland

338 To characterize common Y-chromosomal variation in Finland, we analyzed 1,802  
 339 geographically mapped high-coverage Y chromosome sequences obtained from  
 340 the FINRISK project<sup>16</sup>. Within this dataset we identified a total of 111 distinct  
 341 haplogroup-defining variants observed with at least 1% in the population (Table  
 342 S3; Figure 2A-B). Notably these variants were not exclusively terminal  
 343 haplogroups (i.e., the finest resolution haplogroup that could be classified), but  
 344 also included internal branches of the haplogroup tree. Removing the internal  
 345 branches, we used 55 of the total 111 common haplogroups (i.e., assigned as  
 346 terminal haplogroup for at least one sample) for visualizing the main  
 347 relationships and clustering of Finnish Y chromosomes in a maximum-likelihood  
 348 phylogenetic tree (Figure 2C).

349 We identified the four previously described main haplogroups in Finland (N1a1,  
 350 I1a, R1a, and R1b) (Figure 2A), with similar frequency estimates as previously  
 351 described<sup>7,10</sup>. However, with sufficient sample coverage across the country and  
 352 through the scaling of our estimates by regional population sizes (see Methods),  
 353 our data enabled us to provide refined frequency estimates for these main  
 354 haplogroups. Among the Finnish population, haplogroup N1a1 (TAT) accounted  
 355 for 64.3% (95% CI 62.1 – 66.5%), I1a (M253) for 24.6% (95% CI 22.6 – 26.6%), R1a  
 356 (L62) for 4.3% (95% CI 3.4 – 5.2%) and R1b (CTS2134) for 4.8% (95% CI 3.8 – 5.8%)  
 357 of the Y chromosomes (Figure 2A; Table S3). The remaining 2% of samples carried  
 358 haplogroups previously recognized as rare in the Finnish population<sup>7,10</sup>.

359 Importantly, our data allowed for identification of several sublineages within  
 360 these previously described major haplogroups (Figure 2B-C; Table S3). The most  
 361 notable observation was the subdivision of haplogroup N1a1 into three major  
 362 sublineages within Finland (Figure 2B-C). Practically all N1a1 carriers belonged to  
 363 the haplogroup N1a1a1a1a (F4155) after which the haplogroup divided into  
 364 sublineages N1a1a1a1a1a (CTS2929) (35.5% of N1a1), N1a1a1a1a2a1a1a1a  
 365 (CTS1950) (35.4% of N1a1) and N1a1a1a1a2a1a1a1b (Z4878) (25.2% of N1a1)  
 366 (Figure 2B-C; Table S3). We estimated the TMRCA for haplogroup N1a1a1a1a1a  
 367 (CTS2929) at 4,995 ya, for N1a1a1a1a2a1a1a1a (CTS1950) at 1,754 ya and for  
 368 N1a1a1a1a2a1a1a1b (Z4878) at 2,986 ya, respectively (Table S4).

369 Within haplogroup I1a we observed several sublineages, most notably splitting  
 370 into haplogroups I1a1 (CTS6364) (20.8%) and I1a2 (S244) (3.3%) (Figure 2B; Table  
 371 S3), as previously described<sup>10</sup>. The most common sublineage within haplogroup  
 372 I1a was I1a1b1a4a1a1 (L258) (16.8%), which further divided into lineages  
 373 I1a1b1a4a1a1b (CTS2242) (6.0%) and I1a1b1a4a1a1g (Y15027) (2.3%) (Table S3).

374 Within haplogroup R1a we found that all samples belonged to haplogroup  
 375 R1a1a1b (PF6158), after which it dived into two major sublineages: R1a1a1b1a1a  
 376 (PF7525) (1.5%) and R1a1a1b1a2 (S204) (1.7%) (Figure 2B; Table S3). Within  
 377 haplogroup R1b all samples belonged more specifically to R1b1a1b1 (L478) and  
 378 its sublineages (Figure 2B; Table S3).

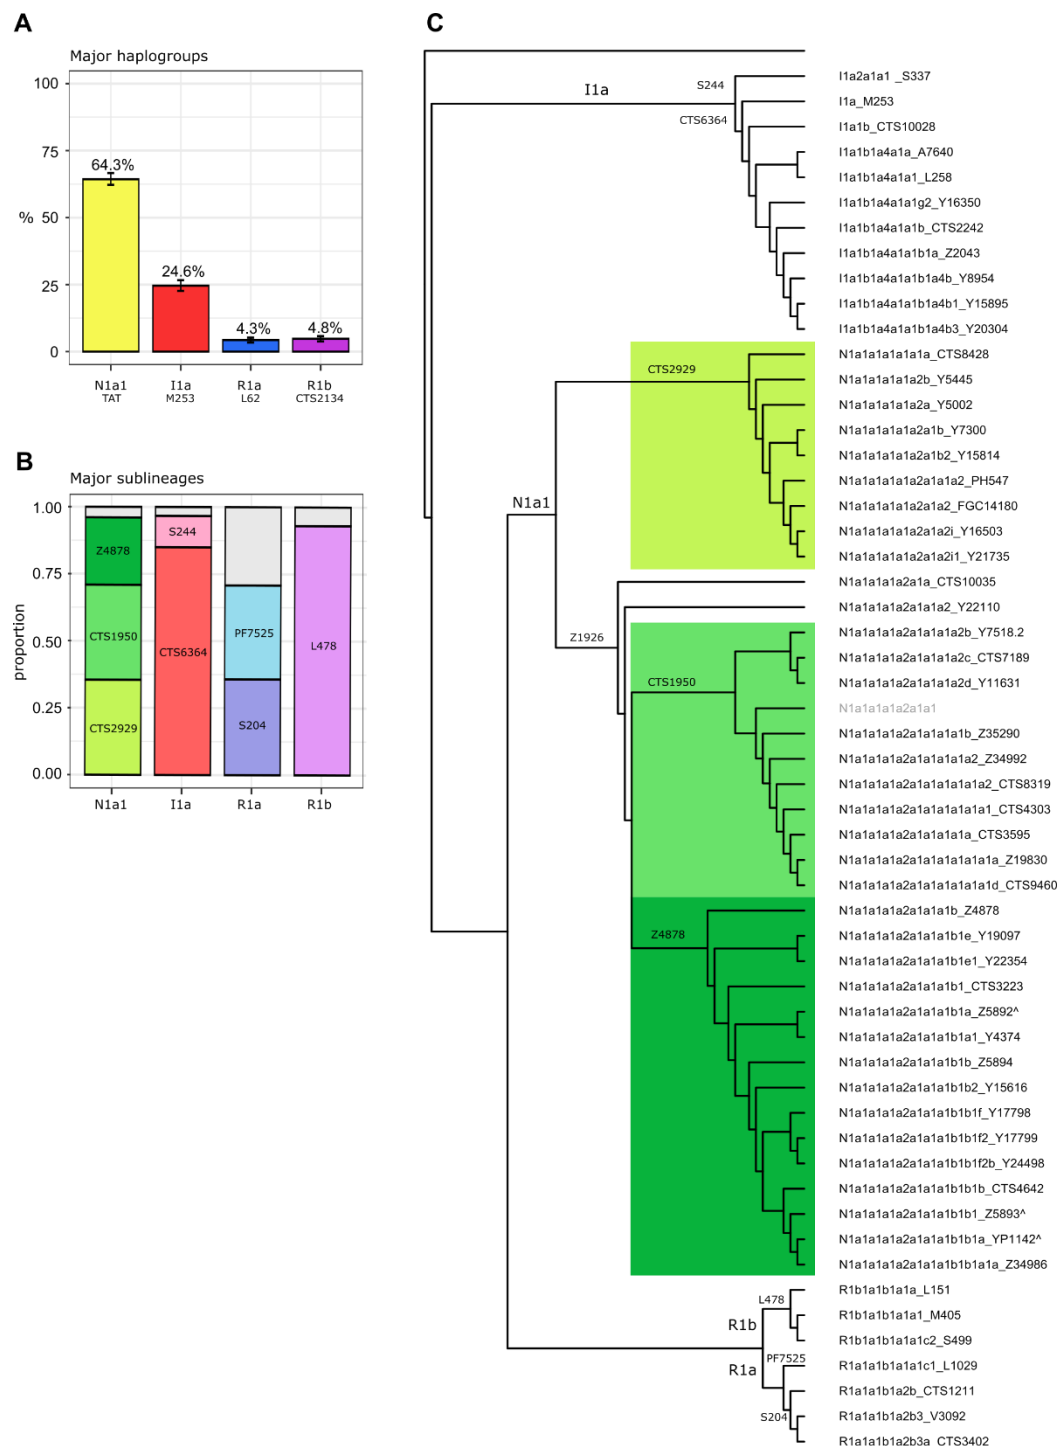

**Figure 2** – Common Y-chromosomal variation in Finland. A) Frequencies of the four major haplogroups, B) proportions of the most common sublineages detected among these, and C) the phylogenetic relationships and subclustering of detailed sublineages. The frequencies indicated on the figure correspond to scaled frequencies (i.e., normalized by regional population sizes). The phylogenetic tree is not scaled to time, with the branch lengths being proportional to the number of tips under the node. Haplogroup N1a1a1a2a1a1 marked in gray has an ambiguous position in the tree, possibly indicating a more detailed haplogroup for this sample than YLineageTracker could classify.

## 388 **Geographical distribution of Y-chromosomal haplogroups in Finland**

389 Previous work have identified differences in the geographical distribution of  
 390 haplogroups N1a1 and I1, especially between the eastern and the western parts  
 391 of Finland, suggested to reflect two distinct migration directions into the  
 392 country<sup>7,10</sup>. Nevertheless, with a sample size three times greater than in previous  
 393 studies and a more comprehensive sampling across the in the country, we were  
 394 able to comprehensively reassess the major haplogroup distribution (Figure 3A),  
 395 and further extend this beyond the major haplogroups to all 111 common  
 396 haplogroup-defining variants within the country (Table S5; Table S6; online  
 397 figures). We assessed the geographical distribution on two levels, by the regional  
 398 frequencies corresponding 1) to each haplogroup's proportion of all samples  
 399 (Table S5) and 2) to each haplogroup's proportion of its major haplogroup (N1a1,  
 400 I1a, R1a or R1b) (Table S6).

401

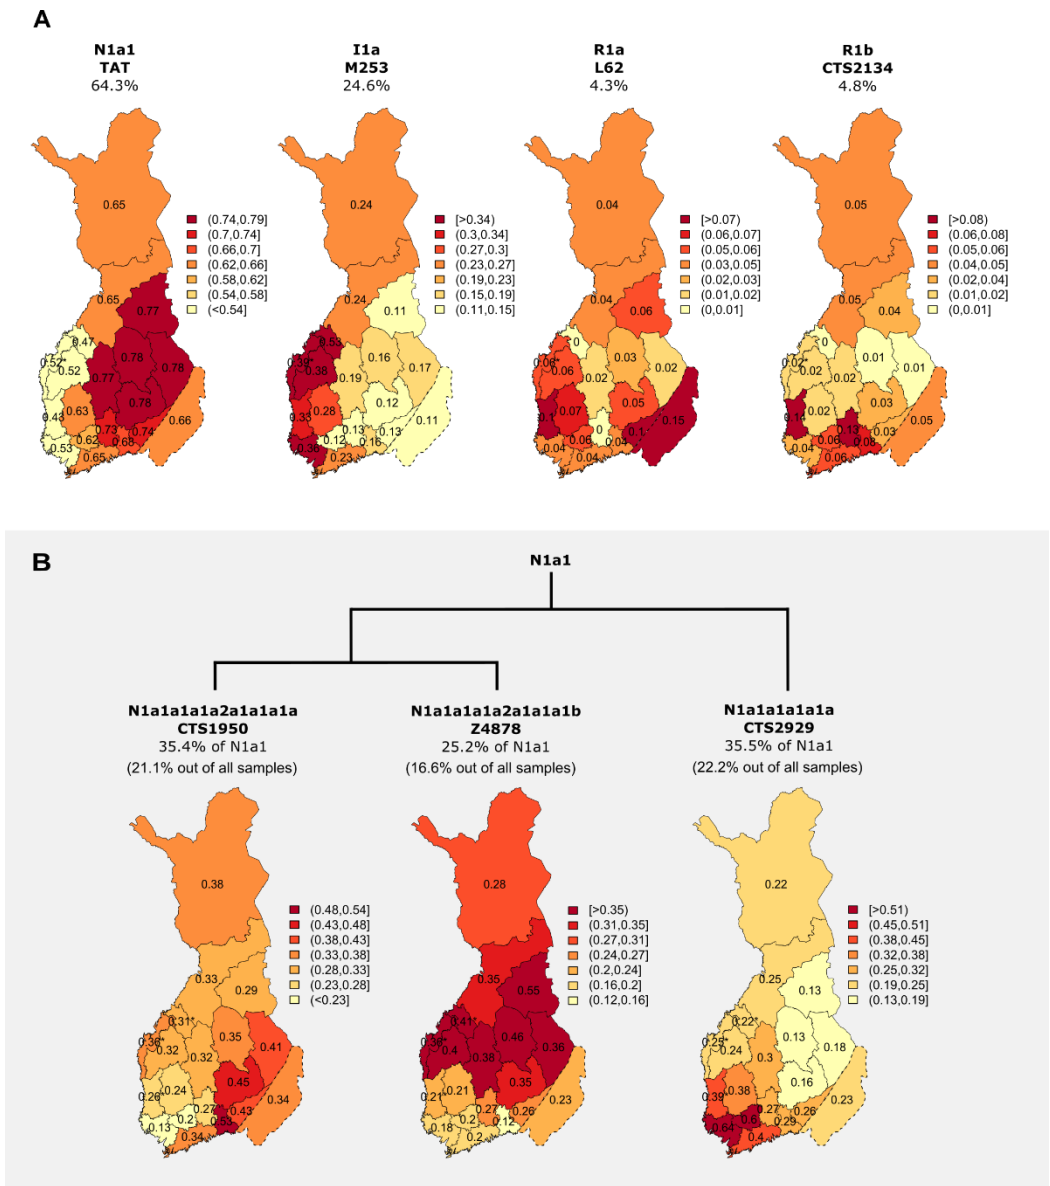

**Figure 3 – Geographical distribution of A) major Y-chromosomal haplogroups N1a1, I1a, R1a, R1b, and B) the three major N1a1 sublineages within Finland. The coloring indicates haplogroup frequency and is scaled for each map separately with the average frequency as the midpoint. In panel A the haplogroup frequencies were calculated out of all samples, whereas in B the haplogroup frequencies are calculated out of the major haplogroup N1a1. \* = haplogroup frequency is imputed from geographically closest regions due to low coverage of samples in the region. In panel A, the frequency for the region OST is imputed, and within panel B regions OST, CO and SAT the frequencies are imputed. The frequencies indicated within the figure headers correspond to scaled frequencies.**

411

**Major haplogroups N1a1, I1a and R1a show east-west differences**

Assessing the geographical enrichment of the 111 haplogroup-defining variants,

we observed in total 65 lineages displaying nominal geographical enrichment (p

415 < 0.05 within the whole dataset and the unrelated subset) (Table S5). As  
 416 previously reported<sup>7,10</sup>, we observed strong geographical enrichment for  
 417 haplogroups N1a1 and I1a (Figure 3A; Table S5). Haplogroup N1a1 reached its  
 418 highest frequency of 78% in North Karelia, North Savonia, and Southern Savonia  
 419 ( $p = 3.1 \times 10^{-7}$ ,  $\chi^2$  test for equal proportions,  $df=18$ ), corresponding to a 1.2-fold  
 420 enrichment compared to the haplogroup frequency within the country (Figure  
 421 3A; Table S5). In contrast, haplogroup I1a displayed an enrichment along the  
 422 western coast of Finland, reaching its peak frequency of 53% in Central  
 423 Ostrobothnia corresponding to a 2.2-fold enrichment ( $p = 6.6 \times 10^{-7}$ ,  $df = 18$ )  
 424 (Figure 3A; Table S5). In addition to these previously established findings, we  
 425 discovered further heterogeneity in the geographical distribution of haplogroup  
 426 R1a ( $p = 1.2 \times 10^{-3}$ ,  $df = 18$ ), displaying a dual enrichment in the east (15% in Ceded  
 427 Karelia) and in the west (10% in Satakunta) (Figure 3A). Although haplogroup R1b  
 428 also initially displayed geographical enrichment ( $p = 0.017$ ,  $df = 18$ ) reaching its  
 429 highest frequency in Satakunta (Figure 3A), this result, however, did not replicate  
 430 in a subset of unrelated individuals ( $p = 0.22$ ,  $df = 18$ ) (Table S5), plausibly  
 431 implying a more dispersed enrichment pattern for R1b throughout the country,  
 432 or could be related to the overall small number of R1b haplogroup carriers ( $N=64$ )  
 433 in our data.

#### 434 **Substantial regional heterogeneity beyond the major haplogroups**

435 We further compared the subsequent sublineages of each of the major  
 436 haplogroups (N1a1, I1a, R1a, R1b) to assess their distributions in better detail  
 437 without being impacted by the major haplogroup enrichment pattern. With this

438 approach we observed 38 sublineages showing regional heterogeneity ( $p < 0.05$ ),  
439 with 19 of these remaining significant after multiple testing correction ( $p <$   
440  $0.05/86$ ) (Table S6). Overall, the majority of these geographically enriched  
441 haplogroups were related to haplogroup N1a1 sublineages.

442 Out of the three identified N1a1 sublineages (Figure 2B-C), haplogroups  
443 N1a1a1a1a2a1a1a (CTS1950) (35% of N1a1) and N1a1a1a1a2a1a1a1b (Z4878)  
444 (25% of N1a1) displayed enrichment predominantly to southeast and northeast  
445 of the country, respectively (Figure 3B, Table S6), with these distributions being  
446 fairly expected given the N1a1 geographical enrichment pattern in the east  
447 (Figure 3A). While N1a1a1a1a2a1a1a1b (Z4878) reached its highest frequency of  
448 55% of N1a1 in Kainuu ( $p = 7.5 \times 10^{-6}$ ,  $df = 18$ ), haplogroup N1a1a1a1a2a1a1a1a  
449 (CTS1950) reached its highest frequency in Kymenlaakso, although this  
450 enrichment was not statistically significant (Figure 3B; Table S6). In contrast to  
451 these eastern enriched N1a1 lineages, haplogroup N1a1a1a1a1a (CTS2929) (36%  
452 out of N1a1) was enriched to the opposite side of the country ( $p = 3.8 \times 10^{-11}$ ,  $df =$   
453 18) (Figure 3B; Table S6). N1a1a1a1a1a (CTS2929) reached its highest frequency  
454 of 64% of N1a1 in Southwest Finland (Figure 3B). This lineage further dived into  
455 two distinct sublineages N1a1a1a1a1a1 (Z4908) (14%) and N1a1a1a1a1a2  
456 (CTS9976) (22%), with slightly differing enrichment patterns from each other  
457 (Table S6; online figures), nevertheless both being clearly enriched to the  
458 southwest (Table S6).

459 Within haplogroup I1a, the majority of its sublineages exhibited the expected  
460 enrichment into the western regions similarly to the major haplogroup (Table S6).

Some of the I1a sublineages further displayed enrichment to the east, such as I1a1b1a4a1a1b1a4 (Y10990) (13.2% of I1a) reaching its highest frequency of 42% of I1a in Ceded Karelia ( $p = 5.0 \times 10^{-4}$ ,  $df = 18$ ). However, for haplogroup R1a and R1b sublineages, we could not find enrichments beyond the major haplogroup level that would suggest a clear centralized area of enrichment, although haplogroup R1b1a1b1a1a (R-L151) (93% of R1b) displayed a nominal evidence for heterogeneity across the regions ( $p = 0.012$ ,  $df = 18$ ) (Table S6). The lack of further observed enrichment patterns within the R1a and R1b sublineages may have been impacted by to their lower frequencies in the data, we nevertheless observed a relatively even distribution for them throughout the country.

## **Autosomal genetic structure correlates with major haplogroups**

### **N1a1 and I1a in Finland**

In addition to the Y-chromosomal haplogroups, the autosomal genetic structure is known to vary geographically in Finland, with the largest differences observed between eastern and western parts of the country<sup>6</sup> (Figure 4A). To gain insights into this connection between the autosomal genetic population structure and Y-chromosomal haplogroups within the country, potentially providing demographic insights for the Y-chromosomal haplogroups, we extended our analyses to examining autosomal genetic structure. To this end, we compared the autosomal genetic background between carriers of different Y-chromosomal haplogroups using two measures, 1) autosomal PCs 1-20, typically used in the characterization and adjustment of genetic population structure (Figure 4A), and 2) previously described autosomal ancestry profiles from Kerminen et al. (2021),



484 at the level of 10 reference populations representing the Finnish population  
485 structure in a finer and more interpretable detail (Figure 4F).

486 PC1 captures the geographically varying east-west autosomal genetic  
487 substructure among Finns (Figure 4A), with this pattern being similar to several  
488 Y-chromosomal haplogroup distributions which were most notably varying along  
489 the east-west axis (Figure 3A; Table S5; Table S6). To quantify this relationship  
490 further, we calculated the correlation between regional haplogroup frequencies  
491 and regional PC1 scores within the country. At the major haplogroup level, we  
492 observed a significant correlation between PC1 and haplogroups N1a1 ( $R = 0.69$ ,  
493  $p = 0.001$ ) and I1a ( $R = -0.60$ ,  $p = 0.006$ ) (Figure 4B-C). In contrast haplogroups  
494 R1a and R1b did not show significant correlation with the PC1, likely impacted by  
495 their more dispersed enrichment patterns.

496 When further assessing the PC1 correlation within the N1a1 subgroups, we  
497 observed that the PC1 correlation pattern of the southwestern enriched lineage  
498 N1a1a1a1a1a (CTS2929) was opposite to that of the main haplogroup N1a1 ( $R =$   
499  $-0.47$ ,  $p = 0.043$ ) (Figure 4B). This observation suggests that the correlation  
500 between the autosomal PCs and Y-chromosomal haplogroups captured on the  
501 major haplogroup level is not necessarily representative of the relationship  
502 within the further sublineages.

503 As a complementary approach, we employed autosomal ancestry profiles from  
504 10 reference populations acquired from Kerminen et al. (2021) (Figure 4F), which  
505 offer a finer and more interpretable representation of the population structure  
506 compared to PCs alone. Here, each sample was assigned with an ancestry based

on the criteria of sharing at least 50% of the genome with one of the reference populations, leaving 485 samples with one major source of ancestry for the analyses. Subsequently, we examined the distributions of these autosomal ancestry assignments among carriers of different haplogroups (Figure 4G-H). For the major haplogroups, we identified expected differences in their autosomal ancestry distributions (Figure 4G; Figure S4). Most of haplogroup N1a1 carriers belonged to the eastern Savo-Karelia ancestry, while carriers of haplogroup I1a displayed higher proportions of western ancestries, such as Southwest, Bothnia, Kokkola, and West Lapland compared to N1a1 (Figure 4G; Figure S4). Within haplogroup R1a we observed the highest proportion of Evacuated ancestry, corresponding to the region of Ceded Karelia (Figure 4G; Figure S4). While R1b displayed visually higher proportions of Kainuu ancestry (Figure 4G), the proportion was not significantly higher than for R1b or N1a1 (Figure S4), likely impacted by the small sample size for R1b (N=12) in the analyses.

### **N1a1 sublineage carriers show distinct autosomal genetic ancestry**

To further investigate whether we could observe differences within the autosomal genetic background of the major N1a1 sublineages, indicative of distinct recent demographics, we conducted a comparison of autosomal ancestry proportions for carriers of the three N1a1 sublineages: N1a1a1a1a1a (CTS2929), N1a1a1a1a2a1a1a1a (CTS1950) and N1a1a1a1a2a1a1a1b (Z4878) (Figure 4H; Figure S5). The northeastern enriched lineages, N1a1a1a1a2a1a1a1a (CTS1950) and N1a1a1a1a2a1a1a1b (Z4878), were both enriched in Savo-Karelia ancestry in a similar manner to the main haplogroup N1a1 (Figure 4G). However, carriers

of the southwestern enriched lineage N1a1a1a1a1a (CTS2929) deviated from this ancestry pattern, displaying a higher proportion of southwestern ancestry compared to the other N1a1 lineages (Figure 4H; Figure S5).

### **Regional differences in PC1 indicate recent population movements**

To further investigate a possible southwestern origin for haplogroup N1a1a1a1a1a (CTS2929), we compared its autosomal genetic background to N1a1a1a1a2a1a1 (Z1926) within individual regions. To this end, we used the autosomal PC1 scores and compared their distributions between these lineages. Within Southwest Finland, we observed significant differences between the PCs for the carriers of the southwestern N1a1a1a1a1a (CTS2929) (N = 29) and northeastern N1a1a1a1a2a1a1 (Z1926) (N = 15) haplogroups (Wilcoxon  $p = 1.3 \times 10^{-4}$ ) (Figure 4K), suggesting distinct demographics for these two haplogroups within this region. Carriers of the southwestern lineage N1a1a1a1a1a (CTS2929) were enriched towards lower PC1 values (typical for samples of southwestern origin), whereas carriers of the northeastern lineage N1a1a1a1a2a1a1 (Z1926) were enriched towards higher PC1 values (typical for northeastern regions). We also observed autosomal differences for these haplogroups in North Karelia, where similarly carriers of the southwestern N1a1a1a1a1a (CTS2929) were enriched towards lower PC1 values compared to the northeastern N1a1a1a1a2a1a1 (Z1926) (Wilcoxon  $p = 1.8 \times 10^{-3}$ ) (Figure 4L). Altogether these findings highlight the distinct autosomal genetic characteristics within these haplogroup N1a1 sublineages, supporting the idea of a possible

552 southwestern introduction for haplogroup N1a1a1a1a1a (CTS2929) and eastern  
553 introduction for N1a1a1a1a2a1a1 (Z1926) into the country.

PC1 correlation with haplogroup frequencies

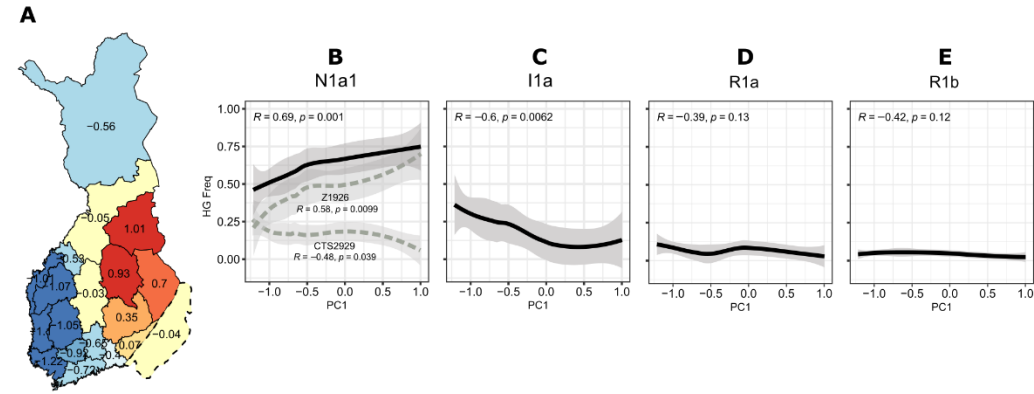

Autosomal ancestry distributions

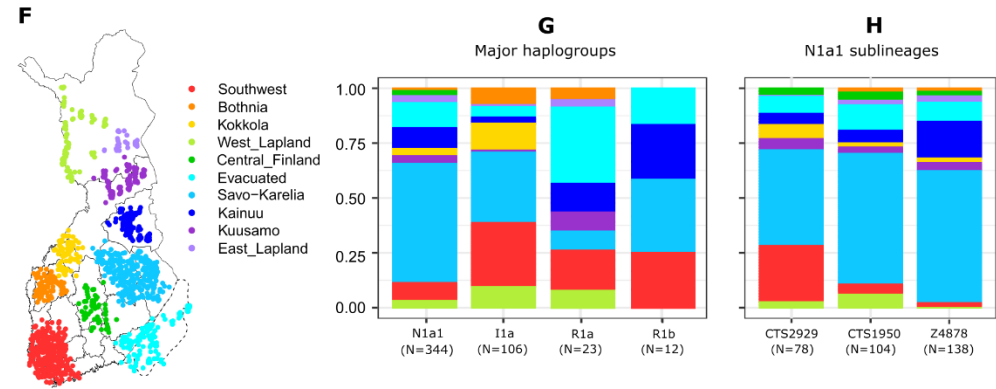

PC1 distribution within regions

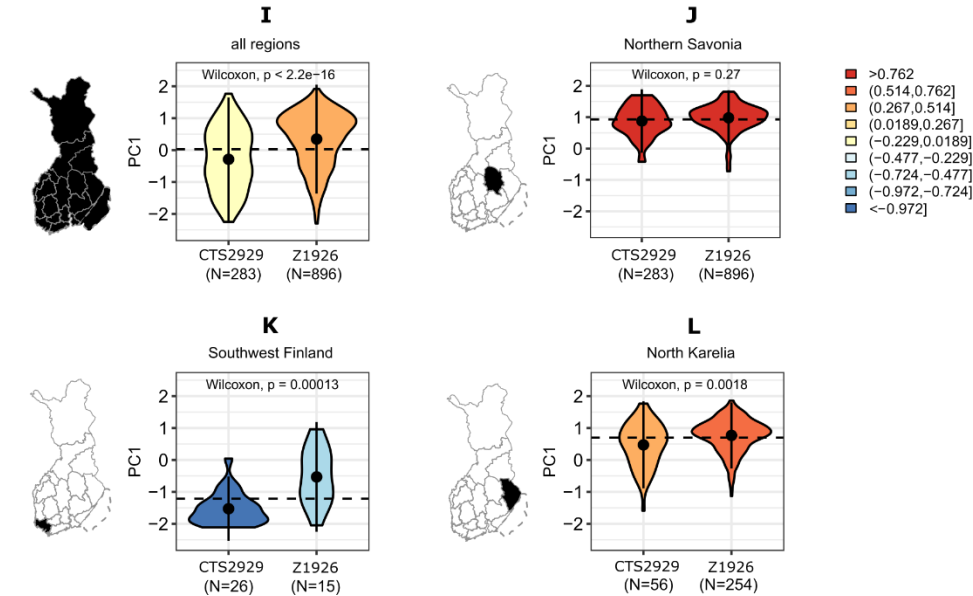

554  
555 **Figure 4** – Connection between the autosomal genome and Y chromosomal haplogroups. A-E)  
556 The correlation between autosomal PC1 and Y-chromosomal haplogroup frequencies regionally

for the major haplogroups. The lines are visualized by LOESS. F-H) Autosomal ancestry distributions by 10 FineSTRUCTURE reference populations from Kerminen et al. (2021), with the coloring ordered by the populations' approximate  $F_{st}$  distances. Each individual was assigned to one population if sharing at least 50% of their genome with the reference population. I-L) Regional distribution of autosomal PC1 regionally compared between haplogroups N1a1a1a1a1a (CTS2929) and N1a1a1a1a2a1a1 (Z1926). The coloring in panels I-L corresponds to autosomal PC1 scores.

564

## 565 DISCUSSION

While the autosomal genome provides a good description of the contemporary genetic structure of a population, the paternally inherited Y chromosome has great potential to elaborate on the population history due to its genetic material not getting recombined through generations. Previous studies have extensively characterized the fine-scale population substructure within Finland, focusing on the autosomal genome<sup>6,17</sup>. However, Y-chromosomal genetic variation among the Finns has remained relatively coarsely characterized, at the resolution of a few genetic markers across a limited number of geographical areas<sup>7,10</sup>.

In this study, we set out to study the Y-chromosomal landscape in Finland by assessing 1,802 Finnish Y chromosome sequences from the FINRISK project. Our data consisted of Finnish men born between 1923 – 1979 with high geographic coverage among the country. Since we used paternal birthplaces for geographical mapping of the samples, our data reflects the Y-chromosomal landscape from the beginning of the 20<sup>th</sup> century to approximately the 1950's, before the start of the large-scale internal movements and urbanization within Finland. Employing the combination of high-coverage sequencing data and extensive geographical coverage, together with a large sample size, allowed for a detailed exploration of Y-chromosomal variation within Finland. The resolution of our data enabled the

subdivision of previously described major haplogroups (N1a1, I1a, R1a, R1b) in Finland into numerous sublineages common in the population and uncovering novel geographical heterogeneity within them. Overall, our findings suggest more complex composition in the paternal lineages in Finland than previously thought, suggesting, for instance, a dual entry for haplogroup N1a1 into the country.

Previously, haplogroup N1a1 (TAT) has been identified as a prominent patrilineage among Finns<sup>7,10</sup>, carried by 64% of Finnish men according to our estimate. Its prevalence is particularly pronounced in eastern Finland, aligning with a proposed eastern influence into Finland within the last millennia<sup>7,10</sup>. Confirming this previously reported eastern enrichment for N1a1 within Finland, our data highlights the specific contribution of haplogroup N1a1a1a1a2a1a1a (Z1926) driving this enrichment pattern. This haplogroup is carried by 63% of all N1a1 carriers, with an overall frequency of 42% among Finnish men. Globally, N1a1a1a1a2a1a1a (Z1926) is known to show high frequency among Finns, reaching notable frequencies also in the neighboring regions towards the east, e.g., among Vepsas, Karelians, Saamis, and North Russians<sup>38</sup>. Furthermore, the lineage N1a1a1a1a2a1a1a (Z1926) descends from N1a1a1a1a2 (Z1936, CTS10082), a haplogroup which has been associated as a plausible connection among members of the Finno-Uralic language family<sup>39</sup>. Within Finland, haplogroup N1a1a1a1a2a1a1a (Z1926) further divides into two main lineages, with a “Savonian” sublineage N1a1a1a1a2a1a1a1b (Z4878) enriched in the northeast, and a “Karelian” sublineage N1a1a1a1a2a1a1a1a (CTS1950) displaying a more dispersed enrichment pattern in the southeast. A possible

608 source of haplogroup N1a1a1a1a2a1a1a (Z1926) into the country could be  
609 through migrations from Siberia<sup>12</sup> that started to arrive in Northeastern Europe  
610 around 3,500 years ago<sup>40</sup>. According to our estimate the “Savonian” and  
611 “Karelian” sublineages share a common ancestor approximately 3,200 years ago,  
612 which could indicate the split of these two groups occurred in the close proximity  
613 of Finland. The presence of many sublineages for these two haplogroups  
614 dispersed throughout the country might reflect population expansion events  
615 during the late settlement process of Finland over the past millennium<sup>41</sup>.

616 In addition to the eastern enriched lineages of N1a1, approximately one third of  
617 N1a1 carriers belong to haplogroup N1a1a1a1a1a (CTS2929), overall carried by  
618 22% of Finnish men. Globally, recognized as the Baltic branch of N1a1, this  
619 haplogroup reaches its highest frequencies among Estonians (28%), and is further  
620 present among Latvians, Lithuanians, Finns, Saami, Karelians, Belarusians,  
621 Ukrainians, Russians<sup>9</sup>. Within Finland, this haplogroup displays strong  
622 geographical enrichment to the southwestern coast of Finland, with the  
623 haplogroup carriers also exhibiting a high proportion of southwestern autosomal  
624 genetic ancestry. This geographical distribution pattern and the autosomal  
625 genetic background of haplogroup N1a1a1a1a1a (CTS2929) carriers distinguish  
626 the lineage from the other N1a1 sublineages within Finland. Overall, observing  
627 N1a1a1a1a1a (CTS2929) in high frequencies in the southwest (64% of N1a1) and  
628 in low frequencies in the east (18% of N1a1) contradicts with the suggested solely  
629 eastern route of N1a1 into the country.

Collectively, these findings indicate the potential source of haplogroup N1a1a1a1a1a (CTS2929) in the southwestern regions of Finland is across the Baltic Sea, potentially originating from Estonia where the haplogroup is frequent<sup>9</sup>. In addition to Estonia being the nearest country to Finland across the Baltic Sea, the two populations share close historical, linguistic, and genetic connections with each other. Southwest Finland in particular, with its coastal location along the Baltic Sea, could have been influenced by such gene flow. Nowadays this area contains one of the largest, and also the oldest city of Finland, Turku. Additionally, the Southwestern Finnish dialect spoken within the area stands out for its similar features to the Estonian language in comparison to other Finnish dialects<sup>42</sup>. Such a potential genetic influence from Estonia could originate from a distant migratory event, or alternatively from a more recent event such as the late migration from Estonia to Finland around 1,300 to 1,100 years ago<sup>43</sup>. However, we cannot determine the arrival time of the haplogroup into the country by utilizing only contemporary DNA. Furthermore, since the haplogroup has also been observed among Swedes<sup>44,45</sup>, although with a low frequency (4.4%)<sup>46</sup>, we nevertheless cannot exclude a more complex pattern of migration affecting the enrichment of N1a1a1a1a1a (CTS2929) in Southwest Finland based on the data of this study.

Beyond haplogroup N1a1, the Finnish population is further enriched in haplogroup I1a (M253), which is carried by 25% of Finnish men according to our estimate. As reported previously, haplogroup I1a reaches its highest frequencies along the western coast of Finland, in concordance with the suggested Scandinavian influence of this haplogroup into the country<sup>7</sup>. While we find a



654 predominantly western enrichment for the majority of the haplogroup I1a  
655 lineages, we further distinguish an eastern enrichment for sublineage  
656 I1a1b1a4a1a1b1a4b (Y8954), carried by 2% of the population. While this  
657 enrichment pattern could indicate an eastern direction of arrival, the gradual  
658 shift from west to east in the enrichment pattern seen for the phylogenetically  
659 higher nodes of this lineage (such as I1a1b1a4a1a1b, CTS2242), rather suggests  
660 population movements from the west causing this eastern enrichment pattern.

661 In addition to haplogroups N1a1 and I1a carried by the vast majority of Finnish  
662 men, approximately 10% of Finnish men belong to haplogroups R1a (L62) and  
663 R1b (CTS2134)<sup>7,10</sup>. While haplogroup R1a (carried by 4.3% of Finnish men) has a  
664 speculated influence from the eastern direction, haplogroup R1b (carried by  
665 4.8% of Finnish men) has been suggested to arrive from the west<sup>47</sup>, aligning with  
666 the global enrichment patterns of these two haplogroups<sup>48,49</sup>. We find that  
667 haplogroup R1a is geographically enriched in the east but is also observed in high  
668 frequencies locally in the west. While this enrichment pattern could indicate a  
669 dual influence of R1a into the country, the fact that in our data we primarily  
670 identified R1a sublineages that have previously been reported among Russians  
671 and Balts, but not in Swedes<sup>50</sup>, support a major eastern influence for R1a into the  
672 country. In contrary, for haplogroup R1b we did not find any significant  
673 enrichment, implying a relatively equal spread for it across the country.  
674 Nevertheless, the lack of the any observed enrichments could partly be  
675 influenced by the relatively small sample size for this haplogroup within our data  
676 (N = 64).

677 In summary, we provide a comprehensive exploration of Y-chromosomal  
678 variation in Finland, moving beyond a few major haplogroup lineages to  
679 unraveling finer-scale variation in the population. In addition to detecting  
680 extensive variation in the Finnish Y-chromosomal haplogroups, we further  
681 describe geographical heterogeneity among these lineages, in particular related  
682 to haplogroup N1a1. Observing geographical differences within the major  
683 lineages of haplogroup N1a1, and further differing autosomal genetic  
684 backgrounds within the carriers, overall suggest distinct demographics within  
685 haplogroup N1a1. We suggest haplogroup N1a1 most likely arrived via two  
686 distinct routes to the country, with the major influence rising from the northeast  
687 via the mainland, and a subsequent influence from the southwestern direction  
688 via the Baltic Sea. Overall, our results highlight that studying the paternally  
689 inherited Y chromosome using WGS data mapped to precise geographical origins,  
690 has potential to capture additional population historical events compared to  
691 autosomal genetic data alone.

## 692 **DATA AVAILABILITY**

693 The data used in this study is available through the National Institute for Health  
694 and Welfare Biobank (<http://www.thl.fi/biobank>). Online figures include regional  
695 enrichment maps for all common Y-chromosomal haplogroup-defining variants  
696 (link to be provided). Supplementary material includes Figures S1-S5 and Tables  
697 S1-S6.

698 This is an open-access article distributed under the terms of the Creative  
699 Commons Attribution 4.0 International License (<https://creativecommons.org/>

700 [licenses/by/4.0/](#)), which permits unrestricted use, distribution, and reproduction  
701 in any medium, provided the original work is properly cited.

## 702 **ACKNOWLEDGEMENTS**

703 The data used for the research was obtained from THL Biobank (study numbers:  
704 BB2019\_44, THLBB2022\_28). We thank all study participants for their generous  
705 participation in biobank research. We thank Priit Palta and Shuang Luo for  
706 providing the SISu reference data for the Y chromosome. We thank Elina Salmela  
707 for insightful discussions and comments on the manuscript.

## 708 **AUTHOR CONTRIBUTIONS**

709 T.T., J.L., A.P., and M.P. designed the study. A.P. conducted the analyses, and J.R.  
710 provided assistance and computational methods in the analyses of autosomal  
711 data. M.P. provided materials and statistical assistance. A.P, J.L., and T.T. wrote  
712 the manuscript. All authors interpreted the results and reviewed the manuscript.

## 713 **FUNDING**

714 This work was financially supported by the Research Council of Finland (grant  
715 nos. 315589 and 345867 to T.T.; 338507 and 352795 to M.P.), Sigrid Jusélius  
716 foundation (T.T. and M.P.), HiLIFE Fellow funding (T.T.), and research funding in  
717 the Doctoral Programme of Population Health from the University of Helsinki  
718 (A.P.).

## 719 ETHICAL APPROVAL

720 The data used in this study originated from the FINRISK study, for which ethical  
721 approval had been obtained at the time of each survey according to the Finnish  
722 legislation and common ethical requirements<sup>16</sup>.

## 723 CONFLICT OF INTEREST

724 The authors declare that they have no conflict of interest.

## 725 REFERENCES

- 726 1 Kääriäinen H, Muilu J, Perola M, Kristiansson K. Genetics in an isolated population  
727 like Finland: a different basis for genomic medicine? *J Community Genet* 2017; **8**:  
728 319–326.
- 729 2 Kurki MI, Karjalainen J, Palta P *et al.* FinnGen provides genetic insights from a well-  
730 phenotyped isolated population. *Nature* 2023; **613**: 508–518.
- 731 3 Lim ET, Würtz P, Havulinna AS *et al.* Distribution and medical impact of loss-of-  
732 function variants in the Finnish founder population. *PLoS Genet* 2014; **10**: e1004494.
- 733 4 Palo JU, Ulmanen I, Lukka M, Ellonen P, Sajantila A. Genetic markers and population  
734 history: Finland revisited. *Eur J Hum Genet* 2009; **17**: 1336–1346.
- 735 5 Salmela E, Lappalainen T, Fransson I *et al.* Genome-Wide Analysis of Single  
736 Nucleotide Polymorphisms Uncovers Population Structure in Northern Europe. *PLoS*  
737 *ONE* 2008; **3**: e3519.
- 738 6 Kerminen S, Havulinna AS, Hellenthal G *et al.* Fine-Scale Genetic Structure in Finland.  
739 *G3 (Bethesda)* 2017; **7**: 3459–3468.
- 740 7 Lappalainen T, Koivumäki S, Salmela E *et al.* Regional differences among the Finns:  
741 a Y-chromosomal perspective. *Gene* 2006; **376**: 207–215.
- 742 8 Kittles RA, Perola M, Peltonen L *et al.* Dual origins of Finns revealed by Y  
743 chromosome haplotype variation. *Am J Hum Genet* 1998; **62**: 1171–1179.
- 744 9 Ilumäe A-M, Reidla M, Chukhryaeva M *et al.* Human Y Chromosome Haplogroup N:  
745 A Non-trivial Time-Resolved Phylogeography that Cuts across Language Families.  
746 *The American Journal of Human Genetics* 2016; **99**: 163–173.
- 747 10 Neuvonen AM, Putkonen M, Översti S *et al.* Vestiges of an Ancient Border in the  
748 Contemporary Genetic Diversity of North-Eastern Europe. *PLoS ONE* 2015; **10**:  
749 e0130331.

- 750 11 Zerjal T, Dashnyam B, Pandya A *et al.* Genetic relationships of Asians and Northern  
751 Europeans, revealed by Y-chromosomal DNA analysis. *Am J Hum Genet* 1997; **60**:  
752 1174–1183.
- 753 12 Zeng TC, Vyazov LA, Kim A *et al.* Postglacial genomes from foragers across Northern  
754 Eurasia reveal prehistoric mobility associated with the spread of the Uralic and  
755 Yeniseian languages. *Genomics*, 2023 doi:10.1101/2023.10.01.560332.
- 756 13 Rootsi S, Zhivotovsky LA, Baldovič M *et al.* A counter-clockwise northern route of the  
757 Y-chromosome haplogroup N from Southeast Asia towards Europe. *Eur J Hum Genet*  
758 2007; **15**: 204–211.
- 759 14 Karlsson AO, Wallerström T, Götherström A, Holmlund G. Y-chromosome diversity  
760 in Sweden – A long-time perspective. *Eur J Hum Genet* 2006; **14**: 963–970.
- 761 15 Rootsi S, Magri C, Kivisild T *et al.* Phylogeography of Y-chromosome haplogroup I  
762 reveals distinct domains of prehistoric gene flow in Europe. *Am J Hum Genet* 2004;  
763 **75**: 128–137.
- 764 16 Borodulin K, Tolonen H, Jousilahti P *et al.* Cohort Profile: The National FINRISK Study.  
765 *International Journal of Epidemiology* 2018; **47**: 696–696i.
- 766 17 Kerminen S, Cerioli N, Pacauskas D *et al.* Changes in the fine-scale genetic structure  
767 of Finland through the 20th century. *PLoS Genet* 2021; **17**: e1009347.
- 768 18 Hallast P, Ebert P, Loftus M *et al.* Assembly of 43 human Y chromosomes reveals  
769 extensive complexity and variation. *Nature* 2023; **621**: 355–364.
- 770 19 Sequencing Initiative Suomi project (SISu). <http://sisuproject.fi>.
- 771 20 Collins RL, Brand H, Karczewski KJ *et al.* A structural variation reference for medical  
772 and population genetics. *Nature* 2020; **581**: 444–451.
- 773 21 Koenig Z, Yohannes MT, Nkambule LL *et al.* A harmonized public resource of deeply  
774 sequenced diverse human genomes. *bioRxiv* 2023; : 2023.01.23.525248.
- 775 22 McLaren W, Gil L, Hunt SE *et al.* The Ensembl Variant Effect Predictor. *Genome Biol*  
776 2016; **17**: 122.
- 777 23 Statistics Finland. <https://pxdata.stat.fi/PxWeb/pxweb/en/StatFin/>.
- 778 24 Chen H, Lu Y, Lu D, Xu S. Y-LineageTracker: a high-throughput analysis framework  
779 for Y-chromosomal next-generation sequencing data. *BMC Bioinformatics* 2021; **22**:  
780 114.
- 781 25 García-Olivares V, Muñoz-Barrera A, Rubio-Rodríguez LA *et al.* A benchmarking of  
782 human Y-chromosomal haplogroup classifiers from whole-genome and whole-  
783 exome sequence data. *Genomics*, 2022 doi:10.1101/2022.09.19.508481.
- 784 26 International Society of Genetic Genealogy (ISOGG). <https://isogg.org>.
- 785 27 Stamatakis A. RAxML version 8: a tool for phylogenetic analysis and post-analysis of  
786 large phylogenies. *Bioinformatics* 2014; **30**: 1312–1313.

- 787 28 Forster P, Harding R, Torroni A, Bandelt HJ. Origin and evolution of Native American  
788 mtDNA variation: a reappraisal. *Am J Hum Genet* 1996; **59**: 935–945.
- 789 29 Skaletsky H, Kuroda-Kawaguchi T, Minx PJ *et al.* The male-specific region of the  
790 human Y chromosome is a mosaic of discrete sequence classes. *Nature* 2003; **423**:  
791 825–837.
- 792 30 Helgason A, Einarsson AW, Guðmundsdóttir VB *et al.* The Y-chromosome point  
793 mutation rate in humans. *Nat Genet* 2015; **47**: 453–457.
- 794 31 Hallast P, Batini C, Zadik D *et al.* The Y-chromosome tree bursts into leaf: 13,000  
795 high-confidence SNPs covering the majority of known clades. *Mol Biol Evol* 2015; **32**:  
796 661–673.
- 797 32 Batini C, Hallast P, Zadik D *et al.* Large-scale recent expansion of European  
798 patrilineages shown by population resequencing. *Nat Commun* 2015; **6**: 7152.
- 799 33 Karmin M, Saag L, Vicente M *et al.* A recent bottleneck of Y chromosome diversity  
800 coincides with a global change in culture. *Genome Res* 2015; **25**: 459–466.
- 801 34 Runfola D, Anderson A, Baier H *et al.* geoBoundaries: A global database of political  
802 administrative boundaries. *PLoS One* 2020; **15**: e0231866.
- 803 35 Browning BL, Browning SR. Genotype Imputation with Millions of Reference  
804 Samples. *The American Journal of Human Genetics* 2016; **98**: 116–126.
- 805 36 Purcell Shaun, Chang Christopher. PLINK 2.0. [www.cog-genomics.org/plink/2.0/](http://www.cog-genomics.org/plink/2.0/).
- 806 37 Chang CC, Chow CC, Tellier LC, Vattikuti S, Purcell SM, Lee JJ. Second-generation  
807 PLINK: rising to the challenge of larger and richer datasets. *GigaSci* 2015; **4**: 7.
- 808 38 Post H, Németh E, Klima L *et al.* Y-chromosomal connection between Hungarians  
809 and geographically distant populations of the Ural Mountain region and West  
810 Siberia. *Sci Rep* 2019; **9**: 7786.
- 811 39 Neparáczi E, Maróti Z, Kalmár T *et al.* Y-chromosome haplogroups from Hun, Avar  
812 and conquering Hungarian period nomadic people of the Carpathian Basin. *Sci Rep*  
813 2019; **9**: 16569.
- 814 40 Lamnidis TC, Majander K, Jeong C *et al.* Ancient Fennoscandian genomes reveal  
815 origin and spread of Siberian ancestry in Europe. *Nat Commun* 2018; **9**: 5018.
- 816 41 Nevanlinna HR. The Finnish population structure A genetic and genealogical study.  
817 *Hereditas* 2009; **71**: 195–235.
- 818 42 Syrjänen K, Honkola T, Lehtinen J, Leino A, Vesakoski O. Applying Population Genetic  
819 Approaches within Languages: Finnish Dialects as Linguistic Populations. *Lang Dyn*  
820 *Change* 2016; **6**: 235–283.
- 821 43 Kivisild T, Saag L, Hui R *et al.* Patterns of genetic connectedness between modern  
822 and medieval Estonian genomes reveal the origins of a major ancestry component  
823 of the Finnish population. *Am J Hum Genet* 2021; **108**: 1792–1806.

- 824 44 Ameer A, Dahlberg J, Olason P *et al.* SweGen: a whole-genome data resource of  
825 genetic variability in a cross-section of the Swedish population. *Eur J Hum Genet*  
826 2017; **25**: 1253–1260.
- 827 45 Krzewińska M, Kjellström A, Günther T *et al.* Genomic and Strontium Isotope  
828 Variation Reveal Immigration Patterns in a Viking Age Town. *Current Biology* 2018;  
829 **28**: 2730-2738.e10.
- 830 46 The universal Y-SNP database. <https://ysnp.erasmusmc.nl/>.
- 831 47 Lappalainen T, Laitinen V, Salmela E *et al.* Migration Waves to the Baltic Sea Region.  
832 *Ann Human Genet* 2008; **72**: 337–348.
- 833 48 Underhill PA, Poznik GD, Rootsi S *et al.* The phylogenetic and geographic structure  
834 of Y-chromosome haplogroup R1a. *Eur J Hum Genet* 2015; **23**: 124–131.
- 835 49 Myres NM, Rootsi S, Lin AA *et al.* A major Y-chromosome haplogroup R1b Holocene  
836 era founder effect in Central and Western Europe. *Eur J Hum Genet* 2011; **19**: 95–  
837 101.
- 838 50 Lall GM, Larmuseau MHD, Wetton JH *et al.* Subdividing Y-chromosome haplogroup  
839 R1a1 reveals Norse Viking dispersal lineages in Britain. *Eur J Hum Genet* 2021; **29**:  
840 512–523.

841
